# Supplementary material for: Assessment of Knowledge of Monkeypox Viral Infection among the General Population in Saudi Arabia
Source: MDPI journal article supplement (doi:10.3390/pathogens11080904), 2022-08-11
Supplement: s1 [file s1]

# Assessment of Knowledge of Monkeypox Viral Infection among the General Population in Saudi Arabia

## Survey

### **Consent question:**

- I am a Saudi person, and my age is over 18 years old. And I voluntarily agree to be a part of this research.
- ✓ Yes
- ✓ No

### **Socio-demographics questions:**

- Age in years .....
- Gender
- ✓ Male
- ✓ Female
- Marital status
- ✓ Married
- ✓ Single
- Which region of Saudi Arabia you are from?
- ✓ Central
- ✓ Western
- ✓ Northern
- ✓ Southern
- ✓ Eastern
- Where do you live?
- ✓ Ruler
- ✓ Urban
- What is your last education level?
- ✓ High school and below
- ✓ Postgraduate degree
- What is your monthly income? State it number....
- Do you have any chronic diseases?
- ✓ Yes
- ✓ No
- Are you an employee?
- ✓ Yes
- ✓ No
- Are you a healthcare worker?
- ✓ Yes
- ✓ No
- Your weight in kg ...
- Your height in cm...
- Are you a smoker?
- ✓ Yes
- ✓ No
- Have you gotten all COVID-19 vaccine shots?
- ✓ Yes

- ✓ No
- Did you complete your childhood vaccination?
- ✓ Yes
- ✓ No
- Do you think monkeypox will affect social and economic life like the COVID-19 pandemic?
- ✓ Yes
- ✓ No
- In your opinion, is monkeypox a conspiracy or bioterrorism?
- ✓ Yes
- ✓ No

**Knowledge about monkeypox questions:**

- What kind of disease does monkeypox cause?
- ✓ Immune disease
- ✓ Infectious disease
- ✓ Hereditary
- ✓ inflammation
- ✓ Metabolic
- Monkeypox is a new infection that appeared this year 2022
- ✓ Yes
- ✓ No
- ✓ I don't know
- Monkeypox is a sexually transmitted disease.
- ✓ Yes
- ✓ No
- ✓ I don't know
- Chickenpox and monkeypox are the same disease.
- ✓ Yes
- ✓ No
- ✓ I don't know
- Monkeypox is common in Middle Eastern countries.
- ✓ Yes
- ✓ No
- ✓ I don't know
- Monkeypox is common in West and Central African countries.
- ✓ Yes
- ✓ No
- ✓ I don't know
- There are many cases recorded in Saudi Arabia.
- ✓ Yes
- ✓ No
- ✓ I don't know
- Monkeypox cases are increasing in the USA and Europe.
- ✓ Yes
- ✓ No
- ✓ I don't know

- Monkeypox is a contagious viral disease.
  - ✓ Yes
  - ✓ No
  - ✓ I don't know
  
- Monkeypox is a contagious bacterial disease.
  - ✓ Yes
  - ✓ No
  - ✓ I don't know
  
- Monkeypox is easily transmitted from one person to another.
  - ✓ Yes
  - ✓ No
  - I don't know
  
- Monkeypox is transmitted to humans through the bites and scratches from infected animals.
  - ✓ Yes
  - ✓ No
  - ✓ I don't know
  
- People with monkeypox can transmit the disease to others (the disease is transmitted between humans).
  - ✓ Yes
  - ✓ No
  - ✓ I don't know
  
- Monkeypox is spread by droplets (coughing and sneezing).
  - ✓ Yes
  - ✓ No
  - ✓ I don't know
  
- The first symptoms of monkeypox are similar to the flu.
  - ✓ Yes
  - ✓ No
  - ✓ I don't know
  
- Skin rash is a symptom of monkeypox.
  - ✓ Yes
  - ✓ No
  - ✓ I don't know
  
- Monkeypox only affects males.
  - ✓ Yes
  - ✓ No
  - ✓ I don't know
  
- Hand sanitizers and face masks are important in preventing monkeypox.
  - ✓ Yes
  - ✓ No
  - ✓ I don't know
  
- There is a special treatment for monkeypox.
  - ✓ Yes
  - ✓ No

- ✓ I don't know
- Monkeypox is spread through bodily fluids.
  - ✓ Yes
  - ✓ No
  - ✓ I don't know
- There is a monkeypox vaccine available in Saudi Arabia.
  - ✓ Yes
  - ✓ No
  - ✓ I don't know
- The chickenpox vaccine I got in childhood protects me from monkeypox.
  - ✓ Yes
  - ✓ No
  - ✓ I don't know
- There is a smallpox vaccine that can be used for monkeypox.
  - ✓ Yes
  - ✓ No
  - ✓ I don't know

**What are your main sources of your current information about Monkeypox? You may choose more than answer**

- ✓ TV and radio
- ✓ Social media
- ✓ Healthcare provider
- ✓ Family or friend
- ✓ Books
- ✓ Research articles
